# Supplementary material
Source: PubMed Central journal article supplement (PMC11587934)
Supplement: NIHMS2034582-supplement-SI.pdf [file NIHMS2034582-supplement-SI.pdf]

## SUPPORTING INFORMATION:

### Design and Characterization of Compact, Programmable, Multistranded Non-Immunostimulatory Nucleic Acid Nanoparticles Suitable for Biomedical Applications

*Ross Brumett<sup>1</sup>, Leyla Danai<sup>2</sup>, Abigail Coffman<sup>1</sup>, Yasmine Radwan<sup>2</sup>, Megan Teter<sup>1</sup>, Hannah Hayth<sup>1</sup>, Erwin Doe<sup>1</sup>, Katelynn Pranger<sup>1</sup>, Sable Thornburgh<sup>1</sup>, Allison Dittmer<sup>1</sup>, Zhihai Li<sup>1</sup>, Tae Jin Kim<sup>3</sup>, Kirill A. Afonin<sup>2</sup>, and Emil F. Khisamutdinov<sup>1\*</sup>*

<sup>1</sup> Department of Chemistry, Ball State University, Muncie, IN 47306, USA

<sup>2</sup> Department of Chemistry, University of North Carolina at Charlotte, Charlotte, NC, 28223, USA

<sup>3</sup> Department of Physical Sciences, West Virginia University Institute of Technology, Beckley, WV, 25801, USA

\* Corresponding Author:

Department of Chemistry, Ball State University, Muncie, IN 47306. Email: [kemil@bsu.edu](mailto:kemil@bsu.edu)

**Supporting Table S1.** DNA triangle sequences utilized in this project.

| DNA Complex name | Strands name  | Sequences                                                 |
|------------------|---------------|-----------------------------------------------------------|
| 0T d3WJ          | ssDNA1 noT    | GAA ATT CCG AGG TCG AAA GAC CTC GCC ATC CC                |
|                  | ssDNA2 noT    | GGG ATG GGA ATT TC                                        |
| 1T d3WJ          | ssDNA1 1xT    | GAA ATT CTC GAG GTC GAA AGA CCT CGT CCA TCC C             |
|                  | ssDNA2 1xT    | GGG ATG GTG AAT TTC                                       |
| 2T d3WJ          | ssDNA1 2xT    | GAA ATT CTT CGA GGT CGA AAG ACC TCG TTC CAT CCC           |
|                  | ssDNA2 2xT    | GGG ATG GTT GAA TTT C                                     |
| 3T d3WJ          | ssDNA1 3xT    | GAA ATT CTT TCG AGG TCG AAA GAC CTC GTT TCC ATC CC        |
|                  | ssDNA2 3xT    | GGG ATG GTT TGA ATT TC                                    |
| 4T d3WJ          | ssDNA1 4xT    | GAA ATT CTT TTC GAG GTC GAA AGA CCT CGT TTT CCA TCC C     |
|                  | ssDNA2 4xT    | GGG ATG GTT TTG AAT TTC                                   |
| 0T DNA triangle  | dT1_0T        | GGCCCTCGCG CTAGGGATGG GAATTTCTGGG                         |
|                  | dT2_0T        | TCGCGACCTTC CCCGAAATTC CGAGGTCGCCC                        |
|                  | dT3_0T        | GATGTTTCGCC CGCGAGGGCC GAAGGTCGCGA                        |
|                  | dT4_0T        | GGGCGACCTCG CCATCCCTAG GCGGAAACATC                        |
| 1T DNA triangle  | dT1_1T        | GGCCCTCGCG T CTAGGGATGG T GAATTTCTGGG                     |
|                  | dT2_1T        | TCGCGACCTTC T CCCGAAATTC T CGAGGTCGCCC                    |
|                  | dT3_1T        | GATGTTTCGCC T CGCGAGGGCC T GAAGGTCGCGA                    |
|                  | dT4_1T        | GGGCGACCTCG T CCATCCCTAG T GCGGAAACATC                    |
| 2T DNA triangle  | dT1_2T        | GGCCCTCGCG TT CTAGGGATGG TT GAATTTCTGGG                   |
|                  | dT2_sh2T      | TCGCGACCTTC TT CCCGAAATTC TT CGAGGTCGCCC                  |
|                  | dT3_2T        | GATGTTTCGCC TT CGCGAGGGCC TT GAAGGTCGCGA                  |
|                  | dT4_2T        | GGGCGACCTCG TT CCATCCCTAG TT GCGGAAACATC                  |
| 3T DNA triangle  | dT1_3T        | GGCCCTCGCG TTT CTAGGGATGG TTT GAATTTCTGGG                 |
|                  | dT2_3T        | TCGCGACCTTC TTT CCCGAAATTC TTT CGAGGTCGCCC                |
|                  | dT3_3T        | GATGTTTCGCC TTT CGCGAGGGCC TTT GAAGGTCGCGA                |
|                  | dT4_3T        | GGGCGACCTCG TTT CCATCCCTAG TTT GCGGAAACATC                |
| 4T DNA triangle  | dT1_4T        | GGCCCTCGCG TTTT CTAGGGATGG TTTT GAATTTCTGGG               |
|                  | Alexa 488_4T* | /5Alex488N/TTT GGCCTCGCG TTTT CTAGGGATGG TTTT GAATTTCTGGG |
|                  | dT2_4T        | TCGCGACCTTC TTTT CCCGAAATTC TTTT CGAGGTCGCCC              |
|                  | dT3_4T        | GATGTTTCGCC TTTT CGCGAGGGCC TTTT GAAGGTCGCGA              |
|                  | dT4_4T        | GGGCGACCTCG TTTT CCATCCCTAG TTTT GCGGAAACATC              |

\*This strand used to assemble Alexa-488 fluorogenic DNA nanoparticle.

**Supporting Table S2.** DNA Polygon sequences utilized in this project.

| DNA NP name | Strands name   | Sequence                                                                                                                        |
|-------------|----------------|---------------------------------------------------------------------------------------------------------------------------------|
| SQR         | dS1            | G GCC CTC GCG TTT TCT AGG GAT GGT TTT CCT CTA TGC CTT<br>TTG AAT TTC GGG                                                        |
|             | Alexa 488_dS1* | G GCC CTC GCG TTT TCT AGG GAT GGT TTT CCT CTA TGC CTT<br>TTG AAT TTC GGG                                                        |
|             | dT2_4T         | TCGCGACCTTCTTTTCCCAGAAATTCTTTTCGAGGTCGCCC                                                                                       |
|             | dT3_4T         | GATGTTTCGCCTTTTCGCGAGGGCCTTTTGAAGGTCGCGA                                                                                        |
|             | dT4_4T         | GGGCGACCTCGTTTTCCATCCCTAGTTTTGGCGAAACATC                                                                                        |
|             | dS5            | GGGCGACCTCGTTTTGGCATAGAGGTTTTTCGAGGTCGCCC                                                                                       |
| PENT        | dP1            | G GCC CTC GCG TTT TCT AGG GAT GGT TTT CCT CTA TGC CTT<br>TTC CTC GTT AGC TTT TGA ATT TCG GG                                     |
|             | Alexa 488_dP1* | /5Alex488N/TT G GCC CTC GCG TTT TCT AGG GAT GGT TTT CCT<br>CTA TGC CTT TTC CTC GTT AGC TTT TGA ATT TCG GG                       |
|             | dT2_4T         | TCGCGACCTTCTTTTCCCAGAAATTCTTTTCGAGGTCGCCC                                                                                       |
|             | dT3_4T         | GATGTTTCGCCTTTTCGCGAGGGCCTTTTGAAGGTCGCGA                                                                                        |
|             | dT4_4T         | GGGCGACCTCGTTTTCCATCCCTAGTTTTGGCGAAACATC                                                                                        |
|             | dS5            | GGGCGACCTCGTTTTGGCATAGAGGTTTTTCGAGGTCGCCC                                                                                       |
|             | dP6            | GGGCGACCTCGTTTTGCTAACGAGGTTTTTCGAGGTCGCCC                                                                                       |
| HEX         | dH1            | G GCC CTC GCG TTT TCT AGG GAT GGT TTT CCT CTA TGC CTT<br>TTC CTC GTT AGC TTT TCT TCG CTG ACT TTT GAA TTT CGG G                  |
|             | Alexa 488_dH1* | /5Alex488N/TT G GCC CTC GCG TTT TCT AGG GAT GGT TTT CCT<br>CTA TGC CTT TTC CTC GTT AGC TTT TCT TCG CTG ACT TTT GAA<br>TTT CGG G |
|             | dT2_4T         | TCGCGACCTTCTTTTCCCAGAAATTCTTTTCGAGGTCGCCC                                                                                       |
|             | dT3_4T         | GATGTTTCGCCTTTTCGCGAGGGCCTTTTGAAGGTCGCGA                                                                                        |
|             | dT4_4T         | GGGCGACCTCGTTTTCCATCCCTAGTTTTGGCGAAACATC                                                                                        |
|             | dS5            | GGGCGACCTCGTTTTGGCATAGAGGTTTTTCGAGGTCGCCC                                                                                       |
|             | dP6            | GGGCGACCTCGTTTTGCTAACGAGGTTTTTCGAGGTCGCCC                                                                                       |
|             | dH7            | GGGCGACCTCGTTTTGTCAGCGAAGTTTTTCGAGGTCGCCC                                                                                       |

\*These strands were used to assemble Alexa-488 fluorogenic DNA nanoparticles.

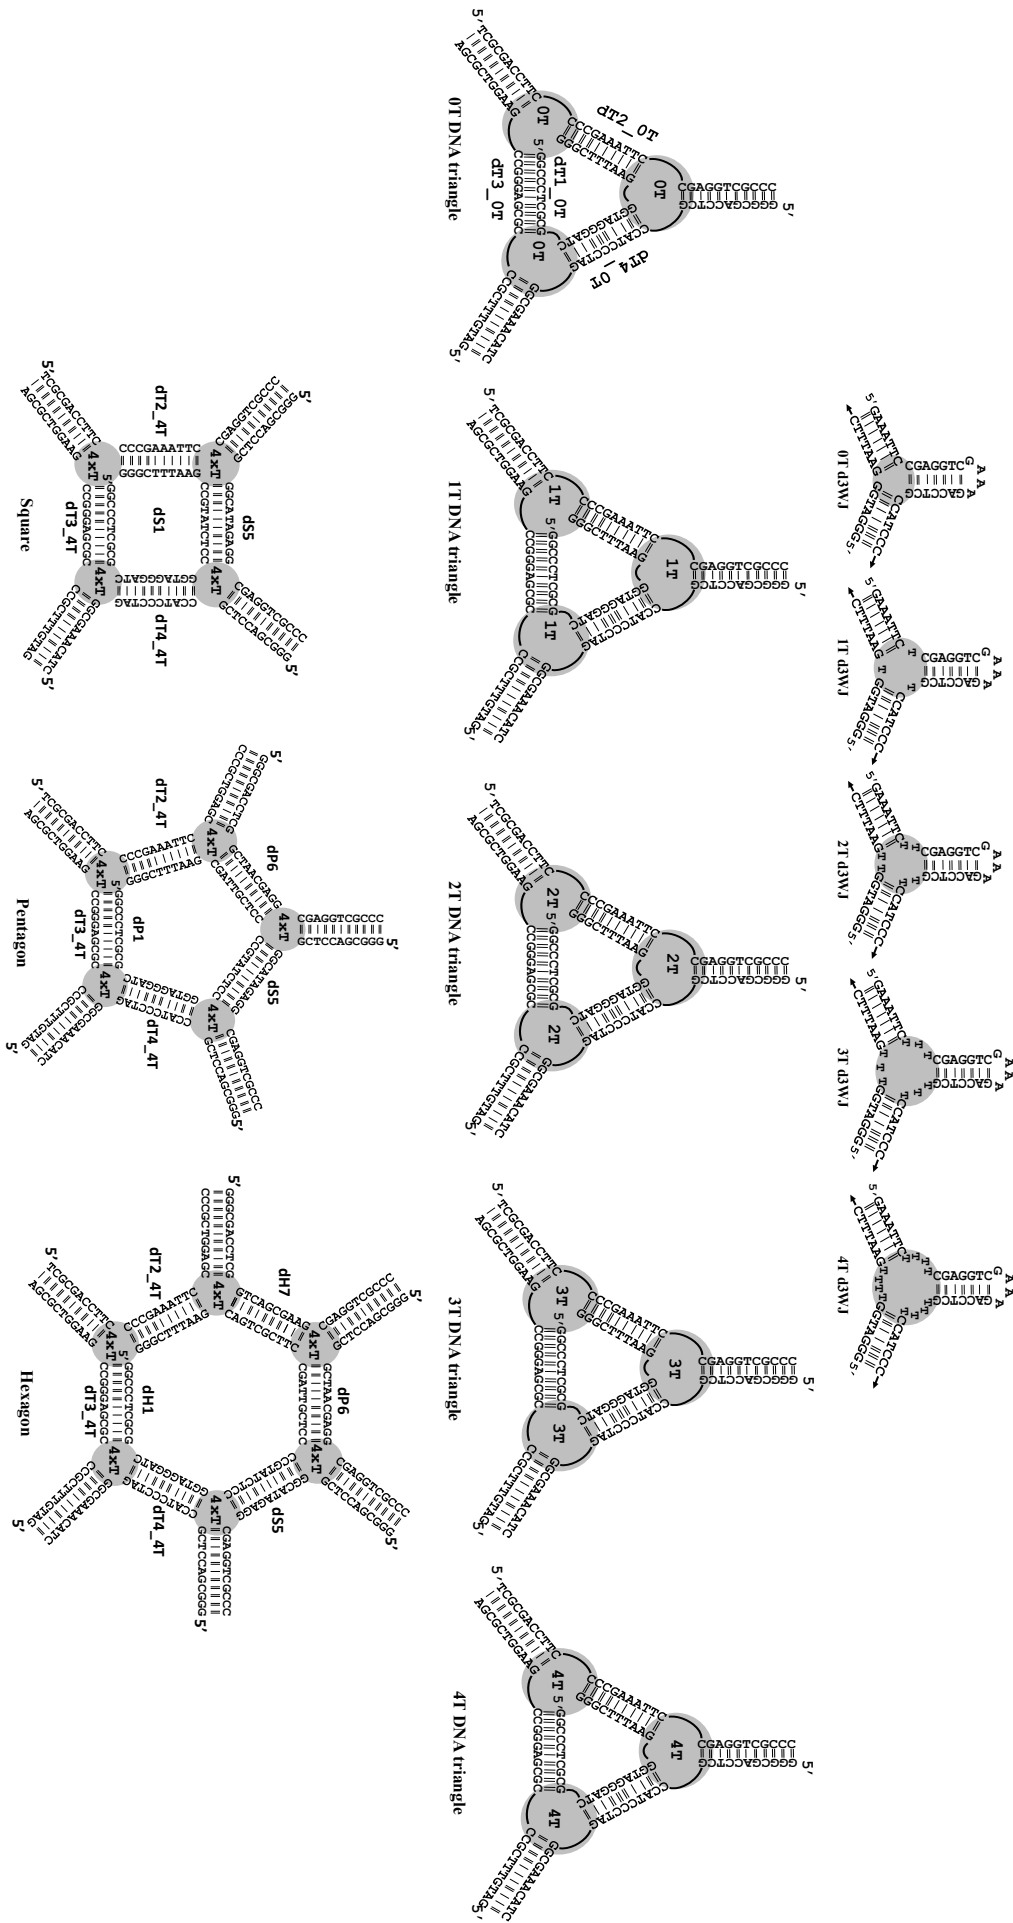

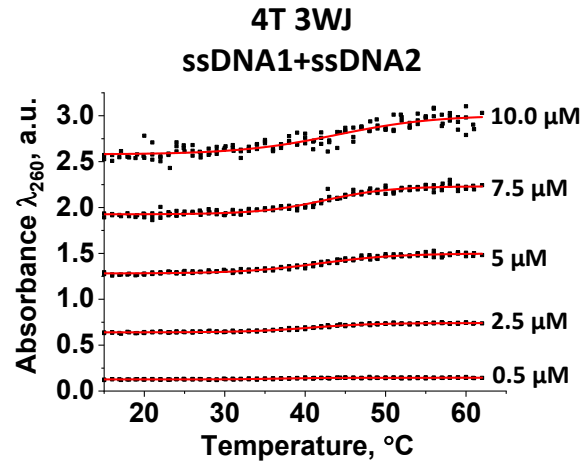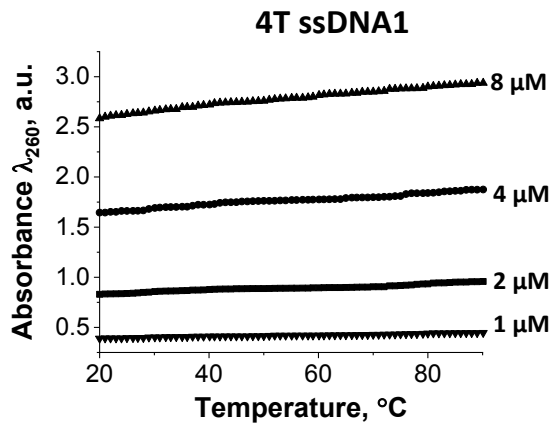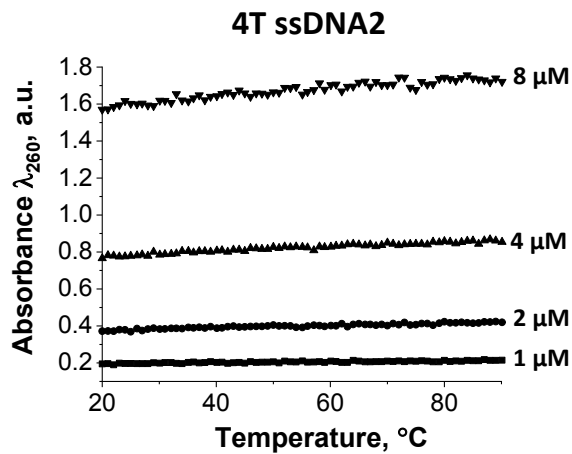

**Supporting Figure S2.** Examples of UV-melt profiles for 4T ssDNA1 and 4T ssDNA2 in CB1 buffer at various concentrations showing no melting transition as compared to 4T d3WJ.

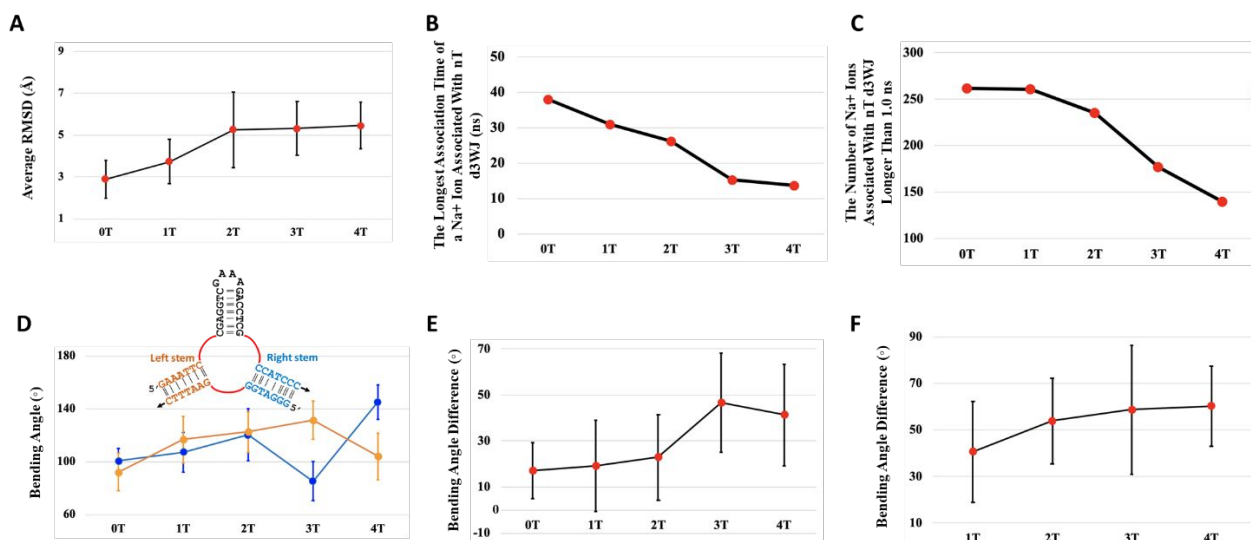

**Supporting Figure S3.** MD simulation data. A) The average root-mean-square deviation (RMSD) of nT d3WJ ( $n = 0 - 4$ ). Vertical bars indicate standard deviation values of each RMSD. B) the longest association time of Na<sup>+</sup> ion associate with d3WJs. C) the number of Na<sup>+</sup> ions associated with d3WJs longer than 1.0 ns. D) The average bending angles of the left (orange) and the right (blue) stems. E) The average bending angle difference between the left and the right stems. F) average bending angle difference between nT d3WJ ( $n = 1 - 4$ ) and 0T d3WJ. Vertical bars indicate standard deviations of bending angle.

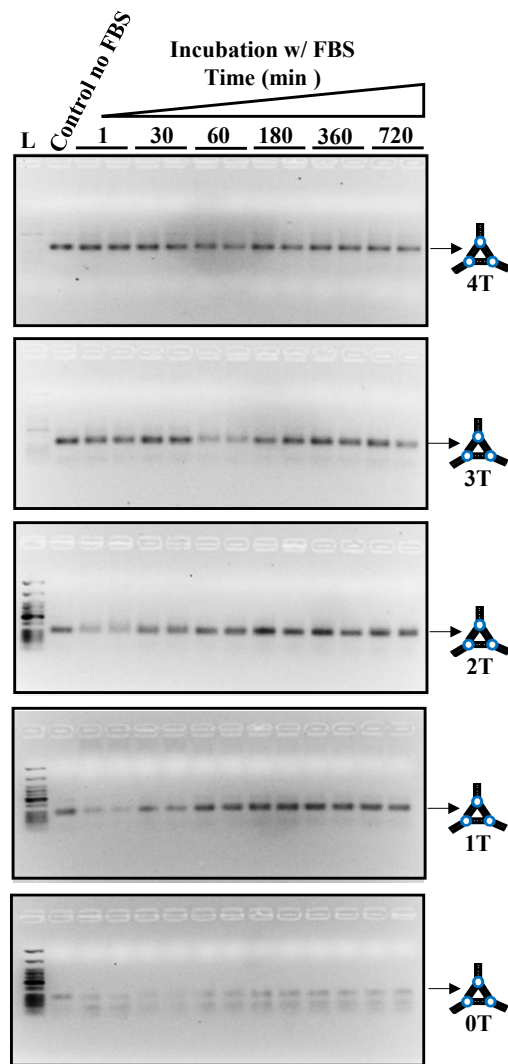

**Supporting Figure S4.** Stability of triangle DNA nanoparticles in 10% FBS at various time points evaluated by 4% agarose gel electrophoresis. Lane L corresponds to DNA molecular ladder (Low Weight DNA, New England Biolabs).

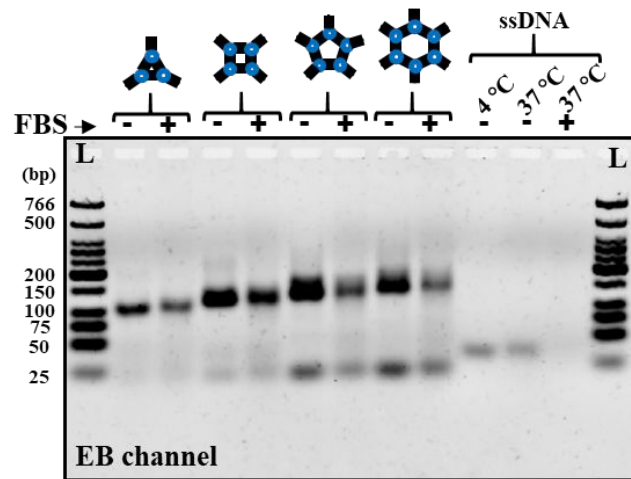

**Supporting Figure S5.** DNA Polygon stability assay in 10% FBS solution assayed by 4% agarose gel electrophoresis. The single stranded DNA (ssDNA) 5'-GGCCCTCGCGTTTTCTAGGGATGGTTTTCTCTATGCCTTTTGAATTCGGG-3' was used as a positive control. Lane L is Low Weight DNA molecular ladder (NewEngland Biolabs).



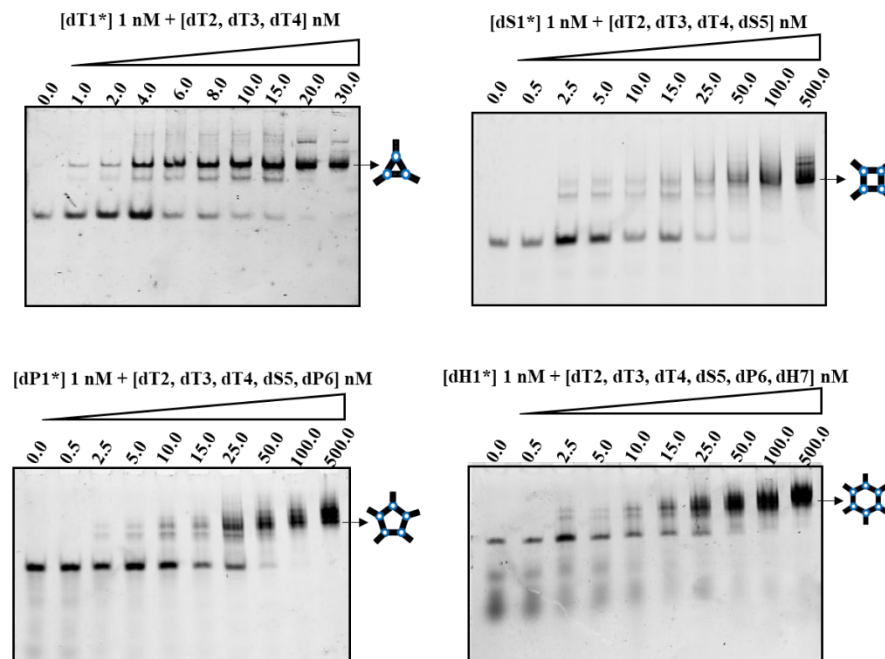

**Supporting Figure S6.** Examples of 7 % native PAGE analysis of DNA polygon formation. The fixed concentration (1 nM) of Alexa488-labeled central DNA strands were titrated with incremental addition of equimolar solution of unlabeled DNA strands covering 0.5 nM- 500 nM range.

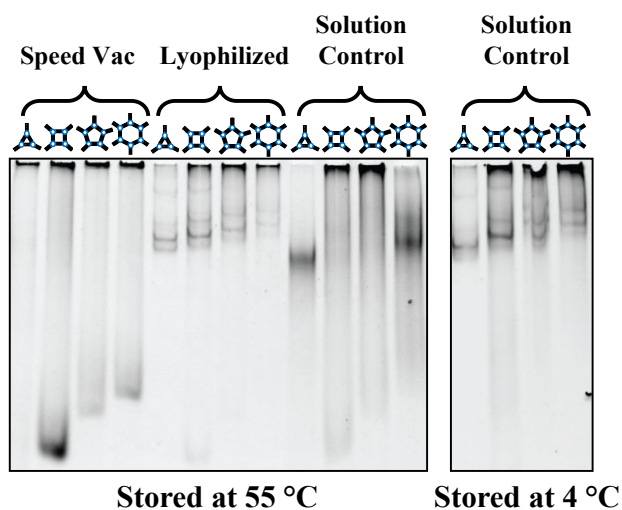

**Supporting Figure S7.** DNA polygon structural integrity assessment by 8% native PAGE after prolonged storage in dehydrated form in harsh conditions
